# Supplementary material for: In Vivo Neocortical [K]o Modulation by Targeted Stimulation of Astrocytes
Source: MDPI journal article supplement (doi:10.3390/ijms22168658), 2021-08-12
Supplement: s1 [file s1]

## Supplementary

LOCUS pAAV-gfaABC1D-eNpHR3.1-eYFP.xdna 6320 bp DNA circular 9/20/2016

DEFINITION

ACCESSION

VERSION

SOURCE

ORGANISM

COMMENT Serial Cloner Genbank Format

COMMENT SerialCloner\_Type=DNA

COMMENT SerialCloner\_Comments=Ligation of : pAAV-gfABC1D-EYFP (2).xdna [4730 nt] : (EcoRI [1569] / AgeI[837]) to pLenti-CaMKIIa-eNpHR\_3.xdna [1693 nt] : (AgeI[3906] / EcoRI[5603])

COMMENT SerialCloner\_Ends=0,0,,0,

FEATURES Location/Qualifiers

misc\_feature 156..836

/label=gfaABC1D

/SerialCloner\_Color=&hFF8040

/SerialCloner\_Show=True

/SerialCloner\_Protect=True

/SerialCloner\_Arrow=True

misc\_feature 2437..3045

/label=WPPE

/SerialCloner\_Color=&hFF0080

/SerialCloner\_Show=True

/SerialCloner\_Protect=True

/SerialCloner\_Arrow=True

misc\_feature 1682..2395

/label=eYFP

/SerialCloner\_Color=&h80FF00

/SerialCloner\_Show=True

/SerialCloner\_Protect=True

/SerialCloner\_Arrow=True

misc\_feature 851..1681

/label=eNpHR3.1

/SerialCloner\_Color=&h0080FF

/SerialCloner\_Show=True

/SerialCloner\_Protect=True

/SerialCloner\_Arrow=True

rep\_origin 5649..6277

/label=ColEI origin

/SerialCloner\_Color=&h4682B4

/SerialCloner\_Show=True

```

        /SerialCloner_Protect=False
        /SerialCloner_Arrow=True
rep_origin      complement(3803..4243)
        /label=F1 ori
        /SerialCloner_Color=&h4682B4
        /SerialCloner_Show=True
        /SerialCloner_Protect=False
        /SerialCloner_Arrow=True
rep_origin      3798..4253
        /label=M13 origin
        /SerialCloner_Color=&h4682B4
        /SerialCloner_Show=True
        /SerialCloner_Protect=False
        /SerialCloner_Arrow=True
CDS              4838..5497
        /label=AmpR
        /SerialCloner_Color=&h8FBC8F
        /SerialCloner_Show=True
        /SerialCloner_Protect=False
        /SerialCloner_Arrow=True
polyA_signal     3066..3546
        /label=hGH polyA signal
        /SerialCloner_Color=&hFFC0CB
        /SerialCloner_Show=True
        /SerialCloner_Protect=False
        /SerialCloner_Arrow=True
Promoter         4570..4598
        /label=Amp prom
        /SerialCloner_Color=&h4682B4
        /SerialCloner_Show=True
        /SerialCloner_Protect=False
        /SerialCloner_Arrow=True
misc_feature     1..141
        /label=L-ITR
        /SerialCloner_Color=&hC0C0C0
        /SerialCloner_Show=True
        /SerialCloner_Protect=True
        /SerialCloner_Arrow=True
misc_feature     complement(3583..3723)
        /label=R-ITR
        /SerialCloner_Color=&hC0C0C0
        /SerialCloner_Show=True
        /SerialCloner_Protect=True
        /SerialCloner_Arrow=True

```

```

primer_bind    577..597
               /label=sgfap_midF
               /SerialCloner_Color=&h808080
               /SerialCloner_Show=True
               /SerialCloner_Protect=True
               /SerialCloner_Arrow=True
primer_bind    1724..1745
               /label=YFP_R
               /SerialCloner_Color=&hC0C0C0
               /SerialCloner_Show=True
               /SerialCloner_Protect=True
               /SerialCloner_Arrow=True
primer_bind    2500..2520
               /label=WPRE_R
               /SerialCloner_Color=&hC0C0C0
               /SerialCloner_Show=True
               /SerialCloner_Protect=True
               /SerialCloner_Arrow=True
primer_bind    2214..2235
               /label=eYFP_3_F
               /SerialCloner_Color=&hC0C0C0
               /SerialCloner_Show=True
               /SerialCloner_Protect=True
               /SerialCloner_Arrow=True
misc_feature    3127..3149
               /label=polyA_5_F
               /SerialCloner_Color=&hC0C0C0
               /SerialCloner_Show=True
               /SerialCloner_Protect=True
               /SerialCloner_Arrow=True
primer_bind    3477..3500
               /label=polyA_3_R
               /SerialCloner_Color=&hC0C0C0
               /SerialCloner_Show=True
               /SerialCloner_Protect=True
               /SerialCloner_Arrow=True
primer_bind    1213..1234
               /label=eNpHR_F
               /SerialCloner_Color=&hC0C0C0
               /SerialCloner_Show=True
               /SerialCloner_Protect=True
               /SerialCloner_Arrow=True
misc_feature    2396..2419
               /label=Export signal + Stop

```

```

/SerialCloner_Color=&hFF00FF
/SerialCloner_Show=True
/SerialCloner_Protect=True
/SerialCloner_Arrow=True
/SerialCloner_Desc=note="direct strand translation"translation="FCYENEV" \

```

ORIGIN

```

1 cctgcaggca gctgcgcgct cgctcgctca ctgaggccgc ccgggcaaag cccgggcgct
61 gggcgacatt tggtcgcccc gcctcagtga gcgagcgagc gcgcagagag ggagtggcca
121 actccatcac taggggttcc tgcggccgca cgcgtaacat atcctggtgt ggagtagggg
181 acgctgtctt gacagaggct cgggggcctg agctggctct gtgagctggg gaggagcgag
241 acagccaggc cttgtctgca agcagacctg gcagcattgg gctggccgcc cccaggggcc
301 tcctcttcat gccagtgaa tgactcacct tggcacagac acaatgttcg gggtagggcac
361 agtgccctgt tcccgccgca cccagcccc cctcaaatgc cttccgagaa gccattgag
421 cagggggcct gcatgcacc ccagcctgac agcctggcat cttgggataa aagcagcaca
481 gccccctagg ggtgcacctt gctgtgtggc gccaccggcg gtggagaaca aggtcttatt
541 cagcctgtgc ccagaaaagg gcatcagggg atgccaggc atggacagtg ggtggcaggg
601 ggggagagga gggctgtctg cttcccagaa gtccaaggac acaaatgggt gaggggagag
661 ctctcccat agctgggctg cggcccaacc cccccctc aggtatgcc agggggtgtt
721 gccaggggca cccgggcacg gccagtctag cccactcctt cataaagccc tcgcatcca
781 ggagcgagca gagccagagc aggttgaga ggagacgcat cactcgcgt gctcgaccg
841 gtaggccacc atggttacc aaaggagtt gttcgagttc gtgctgaac accctttgct
901 tgcaagcagt ctctatatca acatgcact tgcaggactg agtatactgc tgttcgtttt
961 tatgaccga ggaactgatg atccacgggc aaaacttatt gctgtgtcaa ccatccttgt
1021 gcctgtcgtc agcattgcct cctacactgg attggcgagc ggctgacaa tttcgttct
1081 tgaaatgcca cggggccatt ttgcagaagg cagctcagtg atgctgggag gagaagaggt
1141 agatggtgta gtcaccatgt ggggacgcta tctcacctgg gcactttcca cgccatgat
1201 tctcctcgct ctgggtctcc tggccgaag caatgctaca aagctcttca cagctatcac
1261 tttcgatata gctatgtcgc tgactggcct tgcgcgggcc ctgactacct cctccacctt
1321 catgagatgg tcttggtacg ctatcagttg tgcagctctt ctggtggtct tgtatatact
1381 gctggtggag tgggcacagg acgccaagc cgcgggaacc gctgacatgt tcaataacct
1441 gaagctgttg acagtagtga tgtggtggg gtatccaatt gtgtgggctc ttggagtcga
1501 gggatcgcg gtgttgcccc ttggggtgac gagctgggga tattctttcc tggatatcgt
1561 ggcaaagtac attttcgcat tcttgctcct gaactatctg acgtcaaagc aatctgtcgt
1621 gtccggcagc attttgatg ttccatctgc ttctgggacc ccggtgatg atcgcgccgc
1681 cgtgagcaag ggcgaggagc tgttcaccgg ggtggtgccc atcctggtcg agctggacgg
1741 cgacgtaaac ggcacaagt tcagcgtgtc cggcgagggc gagggcgatg ccacctacgg
1801 caagctgacc ctgaagtcca tctgcaccac cggcaagctg cccgtgccct ggccccacct
1861 cgtgaccacc ttcggctacg gcctgcagtg cttcgcccc taccccgacc acatgaagca
1921 gcacgacttc ttcaagtcg ccatgcccga aggctacgtc caggagcgca ccatcttctt
1981 caaggacgac ggcaactaca agaccgcgc cgaggtgaag ttcgagggag acaccctggt
2041 gaaccgcatc gagctgaagg gcatcgactt caaggaggac ggcaacatcc tggggcacia
2101 gctggagtac aactacaaca gccacaacgt ctatatcatg gccgacaagc agaagaacgg
2161 catcaagggt aacttaaga tccgccaaa catcgaggac ggcagcgtgc agctcgccga
2221 ccaactaccg cagaaccccc ccatcgcgca cgccccgtg ctgctgccc acaaccata

```

2281 cctgagctac cagtccgccc tgagcaaaga ccccaacgag aagcgcgac acatggctct  
 2341 gctggagttc gtgaccgccg ccgggacac tctcgcatg gacgagctgt acaagttctg  
 2401 ctacgagaac gaggtgtaat gagaattcga tatcaagctt atcgataatc aacctctgga  
 2461 ttacaaaatt tgtgaaagat tgactggat tcttaactat gttgctcctt ttacgctatg  
 2521 tggatacgt gctttaatgc ctttgtatca tgctattgct tcccgtatgg ctttcatttt  
 2581 ctctctcttg tataaatcct ggttgctgtc tctttatgag gagtgtggc ccgttgctcag  
 2641 gcaacgtggc gtggtgtgca ctgtgtttgc tgacgcaacc cccactgggt ggggcattgc  
 2701 caccacctgt cagctccttt ccgggacttt cgttttcccc ctccctattg ccacggcgga  
 2761 actcatgcc gcctgccttg ccgctgctg gacaggggct cggctgttgg gcaactgaaa  
 2821 ttccgtgggt ttgtcgggga aatcatcgtc ctttccttgg ctgctcgctt gtgttgccac  
 2881 ctggattctg cgcgggacgt ccttctgcta cgtcccttcg gccctcaatc cagcggacct  
 2941 tcttccccg gccctgctgc cggtctgctg gcctcttcg cgtcttcgcc ttccctctca  
 3001 gacgagtcgg atctcccttt ggccgcctc ccgcatcga taccgagcgc tgctcgagag  
 3061 atctacgggt ggcacccctg tgacccctcc ccagtgcctc tcttgccctt ggaagtggc  
 3121 actccagtgc ccaccagctt tgcctaata aaattaagtt gcatcatttt gtctgactag  
 3181 gtgtccttct ataataattt ggggtggagg ggggtggtat ggagcaagg gcaagtggg  
 3241 aagacaacct gttagggcctg cggggtctat tgggaaccaa gctggagtgc agtggcaca  
 3301 tcttggtcga ctgcaatctc cgccctctgg gttcaagcga ttctctgcc tcagccctcc  
 3361 gagggtgttg gattccaggc atgcatgacc aggctcagct aatttttgtt ttttggtag  
 3421 agacgggggt tcacatattt ggccaggctg gtctccaaat cctaattctc ggtgatctac  
 3481 ccaccttggc ctcccaaatt gctgggatta caggcgtgaa ccaactgctc ctccctgtc  
 3541 cttctgattt ttaggtaac cacgtgcgga ccgagcgccc gcaggaacct ctagtgatg  
 3601 agttggccac tccctctctg cgcgctcgt cgtcactga ggccggcgga ccaaaggtcg  
 3661 cccgacgccc gggctttgcc cggcgccct cagtgcgca gcgagcgcg agctgcctgc  
 3721 agggcgccct gatcggtat tttctctta cgcactctgt cggattttca caccgcatac  
 3781 gtcaaagcaa ccatagtacg cgcctgtag cggcgatta agcgcggcgg gtgtggtgt  
 3841 tacgcgcagc gtgaccgcta cacttgccag cgccttagcg cccgctcctt tcgctttctt  
 3901 cccttctctt ctgccacgt tcgccggtt tccccgtaa gctctaaatc gggggctccc  
 3961 tttagggttc cgatttagtg ctttacgga cctcgacccc aaaaaacttg atttgggtga  
 4021 tggttcacgt agtgggcat cgcctgata gacggttttt cgcctttga cgttgagtc  
 4081 cacgttcttt aatagtggac tcttgtcca aactggaaca aactcaacc ctatctcggg  
 4141 ctattctttt gatttataag ggattttgcc gatttcggcc tattggttaa aaaatgagct  
 4201 gatttaacaa aaatttaacg cgaattttaa caaaatatta acgtttacaa ttttatggg  
 4261 cactctcagt acaatctgct ctgatgccg atagttaagc cagccccgac acccgccaac  
 4321 acccgctgac gcgcctgac gggcttgtct gctcccgga tccgcttaca gacaagctgt  
 4381 gaccgtctcc gggagctgca tgtgtcagag gttttcaccc tcacaccca aacgcgcgag  
 4441 acgaaagggc ctgctgatac gcctattttt ataggttaat gtcataata taatgggttc  
 4501 ttgacgtca ggtggcactt ttcggggaaa tgtgcgcgga acccctattt gtttattttt  
 4561 ctaatacat tcaaatatgt atccgctcat gagacaataa ccctgataaa tgcttcaata  
 4621 atattgaaaa aggaagagta tgagtattca acatttcctg gtcccttata ttccctttt  
 4681 tgccgcatth tgccctctg tttttgtca ccagaaacg ctggtgaaag taaaagatgc  
 4741 tgaagatcag ttgggtgcac gagtgggtta catcgaaact gatctcaaca gcggtgaag  
 4801 ccttgagagt tttcgcccc aagaacgttt tccaatgat agcactttta aagttctgct  
 4861 atgtggcgcg gtattatccc gtattgacgc cgggcaagag caactcggtc gccgcataca

4921 ctattctcag aatgacttgg ttgagtactc accagtcaca gaaaagcadc ttacggatgg  
 4981 catgacagta agagaattat gcagtgtgtc cataaccatg agtgataaca ctgcggccaa  
 5041 cttacttctg acaacgatcg gaggaccgaa ggagctaacc gcttttttgc acaacatggg  
 5101 ggatcatgta actcgccttg atcgttggga accggagctg aatgaagcca taccaaacga  
 5161 cgagcgtgac accacgatgc ctgtagcaat ggcaacaacg ttgcgcaaac tattaactgg  
 5221 cgaactactt actctagctt cccggcaaca attaatagac tggatggagg cggataaagt  
 5281 tgcaggacca cttctgcgct cgcccttcc ggctggctgg tttattgctg ataaatctgg  
 5341 agccggtgag cgtgggtctc gcggtatcat tgcagcactg gggccagatg gtaagccctc  
 5401 ccgtatcgta gttatctaca cgacggggag tcaggcaact atggatgaac gaaatagaca  
 5461 gatcgctgag ataggtgcct cactgattaa gcattggtaa ctgtcagacc aagtttactc  
 5521 atatatactt tagattgatt taaaacttca tttttaattt aaaaggatct aggtgaagat  
 5581 cctttttgat aatctcatga ccaaaatccc ttaacgtgag ttttcgttcc actgagcgtc  
 5641 agaccccgta gaaaagatca aaggatcttc ttgagatcct ttttttctgc gcgtaatctg  
 5701 ctgcttgcaa acaaaaaaac caccgctacc agcggtggtt tgtttgccgg atcaagagct  
 5761 accaactctt tttccgaagg taactggctt cagcagagcg cagataccaa atactgtcct  
 5821 tctagtgtag ccgtagttag gccaccactt caagaactct gtagcaccgc ctacatacct  
 5881 cgctctgcta atcctgttac cagtggctgc tgccagtggc gataagtcgt gtcttaccgg  
 5941 gttggactca agacgatagt taccggataa ggccgagcgg tcgggctgaa cgggggggtc  
 6001 gtgcacacag cccagcttgg agcgaacgac ctacaccgaa ctgagatacc tacagcgtga  
 6061 gctatgagaa agcgccacgc ttcccgaagg gagaaaggcg gacaggtatc cggtaagcgg  
 6121 cagggtcgga acaggagagc gcacgaggga gcttccaggg ggaaacgcct ggtatcttta  
 6181 tagtctgtc gggtttcgcc acctctgact tgagcgtcga tttttgtgat gctcgtcagg  
 6241 ggggcggagc ctatggaaaa acgccagcaa cgcggccttt ttacggttcc tggccttttg  
 6301 ctggcctttt gctcacatgt

//

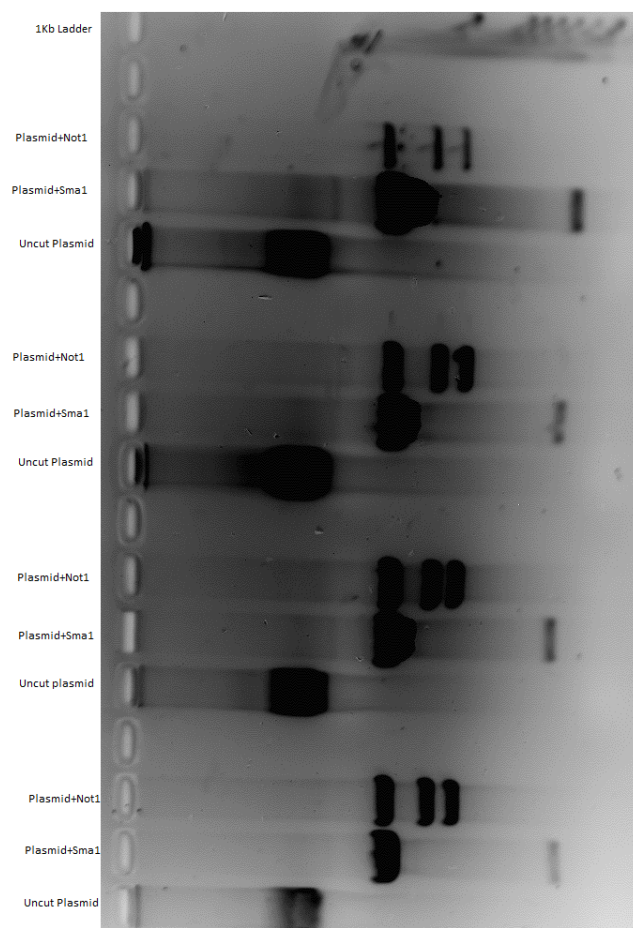

Fig. S.1) Western blot gel presenting the successful insertion of the plasmid.
